# Supplementary material for: High-level heterologous production and Functional Secretion by recombinant Pichia pastoris of the shortest proline-rich antibacterial honeybee peptide Apidaecin
Source: PubMed Central journal article supplement (PMC5674047; doi:10.1038/s41598-017-15149-3), 2017-11-06
Supplement: 41598_2017_15149_MOESM1_ESM.pdf [file 41598_2017_15149_MOESM1_ESM.pdf]

High-level heterologous production and Functional Secretion by recombinant *Pichia pastoris* of the shortest proline-rich antibacterial honeybee peptide Apidaecin

Ximing Chen<sup>ab1</sup>, Juan Li<sup>ab1</sup>, Haili Sun<sup>c</sup>, Shiweng Li<sup>d</sup>, Tuo Chen<sup>ab</sup>, Guangxiu Liu<sup>ab\*</sup>, Paul Dyson<sup>e</sup>

<sup>a</sup> Key Laboratory of Desert and Desertification, Northwest Institute of Eco-Environment and Resources, Chinese Academy of Sciences ; China

<sup>b</sup> Key Laboratory of Extreme Environmental Microbial Resources and Engineering of Gansu Province ; China

<sup>c</sup> School of Chemistry and Environment Science, Lanzhou City University; China

<sup>d</sup> School of Chemical and Biological Engineering, Lanzhou Jiaotong University; China

<sup>e</sup> Institute of Life Science, Swansea University Medical School, Singleton Park, Swansea SA2 8PP, UK

\* Corresponding authors: To whom correspondence should be addressed.

Email: liugx@lzb.ac.cn

<sup>1</sup> These authors contributed equally to this work.

TABLE S1. Microorganisms and plasmids used in this study

| Strain or plasmid                         | Relevant characteristic                                                                                                                                                                        | Source or reference |
|-------------------------------------------|------------------------------------------------------------------------------------------------------------------------------------------------------------------------------------------------|---------------------|
| <b>Bacterial strain</b>                   |                                                                                                                                                                                                |                     |
| <i>E.coli</i> JM109                       | Host strain; F <i>endA1 recA1</i><br><i>gyrA96 thi hsdR17</i> ( $r_K^- m_K^+$ )<br><i>relA1 supE44</i> $\Delta$<br>( <i>lac-proAB</i> )<br>F' <i>traD36 proAB lacIZ</i> $\Delta$<br>M15        | Promega             |
| <b>Yeast (<i>P. pastoris</i>) strains</b> |                                                                                                                                                                                                |                     |
| SMD1168                                   | Host strain; protease A<br>mutant strain for selection<br>on the MD medium; <i>his4</i> ,<br><i>pep4</i> , Mut <sup>+</sup>                                                                    | Invitrogen          |
| C                                         | <i>P. pastoris</i> SMD1168<br>derivative carrying<br>pPIC9K; His <sup>+</sup>                                                                                                                  | This work           |
| AP26                                      | <i>P. pastoris</i> SMD1168<br>derivative carrying<br>pPICAP; His <sup>+</sup>                                                                                                                  | This work           |
| <b>Plasmids</b>                           |                                                                                                                                                                                                |                     |
| pPIC9K                                    | <i>P. pastoris</i> 9-kb protein<br>expression and secretion<br>vector carrying a<br>methanol-inducible<br>promoter (PAOX1),<br>5'AOX1 region, MF $\alpha$ 1 <sub>s</sub> ;<br>His <sup>+</sup> | Invitrogen          |
| pPICAP                                    | pPIC9K derivative<br>carrying apidaecin fused in<br>frame to MF $\alpha$ 1 <sub>s</sub> ; His <sup>+</sup>                                                                                     | This work           |

TABLE S2. Mediums used in this study

| MD           | BMGY                | BMGluY              | YDFM <sup>34</sup>                          | BMM                 | BMMY                | BSM                            |
|--------------|---------------------|---------------------|---------------------------------------------|---------------------|---------------------|--------------------------------|
| 1.34%        | 1.34%               | 1.34%               | 11.83                                       | 1.34%               | 1.34%               | 26.7 ml/L                      |
| YNB          | YNB                 | YNB                 | g/L                                         | YNB                 | YNB                 | Phosphoric<br>acid, 85%        |
| 4 x<br>10-5% | 4 x 10-5%<br>biotin | 4 x 10-5%<br>biotin | 2.29 g/L<br>K <sub>2</sub> HPO <sub>4</sub> | 4 x 10-5%<br>biotin | 4 x 10-5%<br>biotin | 0.93 g/L<br>Calcium<br>sulfate |
| 2%<br>Glucos | 1%<br>glycerol      | 2%<br>Glucose       | 1 g/L                                       | 0.5%<br>methanol    | 0.5%<br>methanol    | 18.2 g/L<br>Potassium          |

|   |                                    |                                    |                                        |                                    |                                    |                                              |
|---|------------------------------------|------------------------------------|----------------------------------------|------------------------------------|------------------------------------|----------------------------------------------|
| e |                                    |                                    | MgSO <sub>4</sub>                      | (ever 24h)                         | (ever 24h)                         | sulfate                                      |
| - | 100 mM potassium phosphate, pH 6.0 | 100 mM potassium phosphate, pH 6.0 | 10 g/L NH <sub>4</sub> SO <sub>4</sub> | 100 mM potassium phosphate, pH 6.0 | 100 mM potassium phosphate, pH 6.0 | 14.9 g/L Magnesium sulfate-7H <sub>2</sub> O |
| - | 1% yeast extract                   | 1% yeast extract                   | 0.33mg/L CaCl <sub>2</sub>             | -                                  | 1% yeast extract                   | 4.13 g/L Potassium hydroxide                 |
| - | 2% tryptone                        | 2% tryptone                        | 1 g NaCl                               | -                                  | 2% tryptone                        | 40.0 g/L Glycerol                            |
| - | -                                  | -                                  | 1g KCl                                 | -                                  | -                                  | 4.35 ml/L PTM                                |
| - | -                                  | -                                  | 3% Glucose                             | -                                  | -                                  | -                                            |
| - | -                                  | -                                  | 4.35 ml/L PTM                          | -                                  | -                                  | -                                            |

PTM is the trace salts mix, which contains 6.0 g Cupric sulfate-5H<sub>2</sub>O; 0.08 g Sodium iodide; 3.0 g Manganese sulfate-H<sub>2</sub>O; 0.2 g Sodium molybdate-2H<sub>2</sub>O; 0.02 g Boric Acid; 0.5 g Cobalt chloride; 20.0 g Zinc chloride; 65.0 g Ferrous sulfate-7H<sub>2</sub>O; 0.2 g Biotin and 5.0 ml Sulfuric Acid per liter.

TABLE S3. The antimicrobial activity (AU/ml) from supernatants of APmu4 and AP26 incubated with 100ug of chemical synthetic apidaecin in different time

| Incubation time at 30°C | AP26 96h     | AP26 96h+100ug AP | APmu4 96h     | APmu4 96h+100ug AP |
|-------------------------|--------------|-------------------|---------------|--------------------|
| 0h                      | 32,470 ± 481 | 1,291,233 ± 35114 | 154,382 ± 605 | 1,436,145 ± 45182  |
| 24h                     | 26,950 ± 325 | 901,213 ± 9628    | 122,589 ± 472 | 976,981 ± 11573    |

TABLE S4. The production antimicrobial activity (AU/ml) of apidaecin from supernatants of *P. pastoris* APmu4 in different medium

|                 | BMGY/BMMY <sup>a</sup> | BMGluY/BMMY    |
|-----------------|------------------------|----------------|
| 0h <sup>b</sup> | ND <sup>c</sup>        | ND             |
| 24h             | 1033 ± 92              | 1351 ± 118     |
| 48h             | 23,519 ± 525           | 45,382 ± 539   |
| 72h             | 341,196 ± 998          | 735,611 ± 1068 |

|            |               |                |
|------------|---------------|----------------|
| <b>96h</b> | 164,583 ± 794 | 549,282 ± 1104 |
|------------|---------------|----------------|

<sup>a</sup> Strain was grown in BMGY or BMGluY and inuction in BMMY at 30°C.

<sup>b</sup> Gene expression was induced at time zero.

<sup>c</sup> ND is no activity detected.

TABLE S5. The production antimicrobial activity (AU/ml) of apidaecin from supernatants of *P. pastoris* APmu4 and AP26

|                       | <b>APmu4</b>   | <b>AP26</b>   |
|-----------------------|----------------|---------------|
| <b>0h<sup>b</sup></b> | ND             | ND            |
| <b>24h</b>            | 1351 ± 118     | 1283 ± 108    |
| <b>48h</b>            | 45,382 ± 539   | 24,589 ± 472  |
| <b>72h</b>            | 735,611 ± 1068 | 261,910 ± 996 |
| <b>96h</b>            | 549,282 ± 1104 | 75,331 ± 528  |

TABLE S6. Pilot-scale fermentation of apidaecin

|                               | <b>Cell wet weight (g/L)</b> | <b>Antimicrobial activity (AU/ml)</b> |
|-------------------------------|------------------------------|---------------------------------------|
| <b>Batch phase</b>            | 92 ± 8                       | ND <sup>a</sup>                       |
| <b>Glucose feeding phase</b>  | 156 ± 13                     | ND                                    |
| <b>Methanol induction 24h</b> | 195 ± 11                     | 3785 ± 211                            |
| <b>Methanol induction 48h</b> | 238 ± 24                     | 852,104 ± 1589                        |
| <b>Methanol induction 72h</b> | 272 ± 18                     | 5,740,361 ± 38520                     |

<sup>a</sup> ND is no activity detected.

TABLE S7. Purification of recombinant apidaecin produced by pilot-scale fermentation

| <b>Purification stage</b>            | <b>Volume (ml)</b> | <b>Total A<sub>254</sub></b> | <b>Total activity (10<sup>3</sup> AU)</b> | <b>Specific activity (AU/A<sub>254</sub>)</b> |
|--------------------------------------|--------------------|------------------------------|-------------------------------------------|-----------------------------------------------|
| <b>Culture supernatant</b>           | 100                | 438.5                        | 5740                                      | 13,090                                        |
| <b>0.22um hollow-fiber membranes</b> | 100                | 424                          | 5716                                      | 13,481                                        |
| <b>10kDa hollow-fiber membranes</b>  | 83                 | 28.6                         | 3527                                      | 123,322                                       |
| <b>1kDa hollow-fiber membrane</b>    | 10                 | 220.5                        | 3182                                      | 14,431                                        |

|                                      |          |            |             |                |
|--------------------------------------|----------|------------|-------------|----------------|
| <b>Anion exchange chromatography</b> | <b>3</b> | <b>5.2</b> | <b>2568</b> | <b>493,846</b> |
|--------------------------------------|----------|------------|-------------|----------------|
